# Supplementary material for: Maternal fructose intake aggravates the harmful effects of a Western diet in rat male descendants impacting their cholesterol metabolism
Source: Royal Society of Chemistry journal article supplement (doi:10.1039/d4fo01466a), 2024-01-01
Supplement: d4fo01466a1.pdf [file d4fo01466a1.pdf]

| 2-way ANOVA | AUC ingested liquid (mL/21 days per rat) |          | AUC consumed diet (g/21 days per rat) |          | Total amount of ingested energy (KCal/21 days per rat) |          | Body weight increase (g) |          | Body weight at day 21 (g) |          | Cholesterolemia (mg/dL) |          |
|-------------|------------------------------------------|----------|---------------------------------------|----------|--------------------------------------------------------|----------|--------------------------|----------|---------------------------|----------|-------------------------|----------|
|             | p                                        | $\eta^2$ | p                                     | $\eta^2$ | p                                                      | $\eta^2$ | p                        | $\eta^2$ | p                         | $\eta^2$ | p                       | $\eta^2$ |
| <b>M</b>    | 0.404                                    | 0.019    | 0.490                                 | 0.014    | 0.689                                                  | 0.005    | 0.296                    | 0.031    | 0.000                     | 0.343    | 0.832                   | 0.001    |
| <b>D</b>    | 0.074                                    | 0.134    | 0.707                                 | 0.020    | 0.122                                                  | 0.110    | 0.442                    | 0.046    | 0.148                     | 0.098    | 0.000                   | 0.381    |
| <b>MxD</b>  | 0.302                                    | 0.064    | 0.267                                 | 0.072    | 0.158                                                  | 0.097    | 0.560                    | 0.033    | 0.679                     | 0.021    | 0.939                   | 0.003    |

  

| 2-way ANOVA | HDL Cholesterol (mg/dL) |          | Non-HDL Cholesterol (mg/dL) |          | Coronary Risk Index |          | Hepatic Cholesterol (mg/g prot) |          | Triglyceridemia (mg/dL) |          | Hepatic triglycerides (mg/g protein) |          |
|-------------|-------------------------|----------|-----------------------------|----------|---------------------|----------|---------------------------------|----------|-------------------------|----------|--------------------------------------|----------|
|             | p                       | $\eta^2$ | p                           | $\eta^2$ | p                   | $\eta^2$ | p                               | $\eta^2$ | p                       | $\eta^2$ | p                                    | $\eta^2$ |
| <b>M</b>    | 0.742                   | 0.003    | 0.928                       | 0.000    | 0.338               | 0.027    | 0.690                           | 0.005    | 0.341                   | 0.025    | 0.528                                | 0.012    |
| <b>D</b>    | 0.000                   | 0.390    | 0.000                       | 0.773    | 0.000               | 0.790    | 0.000                           | 0.857    | 0.043                   | 0.156    | 0.000                                | 0.700    |
| <b>MxD</b>  | 0.438                   | 0.045    | 0.570                       | 0.032    | 0.691               | 0.022    | 0.712                           | 0.019    | 0.775                   | 0.014    | 0.887                                | 0.007    |

  

| 2-way ANOVA | Liver SREBP2 (au) |          | Liver HMGCR (au) |          | Liver ACAT2 (au) |          | Liver SOAT2 (au) |          | Liver ABCG5 (au) |          | Feces cholesterol (mg/g feces) |          | Liver MTTP (au) |          |
|-------------|-------------------|----------|------------------|----------|------------------|----------|------------------|----------|------------------|----------|--------------------------------|----------|-----------------|----------|
|             | p                 | $\eta^2$ | p                | $\eta^2$ | p                | $\eta^2$ | p                | $\eta^2$ | p                | $\eta^2$ | p                              | $\eta^2$ |                 |          |
| <b>M</b>    | 0.149             | 0.057    | 0.639            | 0.006    | 0.041            | 0.182    | 0.663            | 0.005    | 0.536            | 0.011    | 0.095                          | 0.243    | Liver MTTP (au) |          |
| <b>D</b>    | 0.007             | 0.238    | 0.945            | 0.003    | 0.000            | 0.580    | 0.000            | 0.413    | 0.001            | 0.356    | 0.000                          | 0.956    |                 |          |
| <b>MxD</b>  | 0.932             | 0.004    | 0.649            | 0.024    | 0.143            | 0.111    | 0.023            | 0.195    | 0.347            | 0.060    | 0.001                          | 0.405    | p               |          |
| <b>...</b>  | 0.282             | 0.040    | 0.732            | 0.004    | 0.006            | 0.229    | 0.285            | 0.039    | 0.533            | 0.018    | 0.340                          | 0.033    |                 | $\eta^2$ |
| <b>D</b>    | 0.003             | 0.324    | 0.015            | 0.260    | 0.000            | 0.519    | 0.001            | 0.395    | 0.014            | 0.323    | 0.043                          | 0.201    | 0.748           | 0.021    |
| <b>MxD</b>  | 0.867             | 0.010    | 0.116            | 0.143    | 0.037            | 0.203    | 0.511            | 0.045    | 0.020            | 0.300    | 0.523                          | 0.045    | 0.483           | 0.052    |

  

| 2-way ANOVA A | Liver CYP7A1 (au) |          | Liver SHP (au) |          | Liver CYP21A1 (au) |          | Hepatic bile acids (mmol/g protein) |          | Fecal bile acids (mmol/g protein) |          | Ileal ACAT2 (au) |          |
|---------------|-------------------|----------|----------------|----------|--------------------|----------|-------------------------------------|----------|-----------------------------------|----------|------------------|----------|
|               | p                 | $\eta^2$ | p              | $\eta^2$ | p                  | $\eta^2$ | p                                   | $\eta^2$ | p                                 | $\eta^2$ | p                | $\eta^2$ |
| <b>M</b>      | 0.783             | 0.002    | 0.325          | 0.029    | 0.013              | 0.163    | 0.257                               | 0.038    | 0.620                             | 0.011    | 0.245            | 0.037    |
| <b>D</b>      | 0.121             | 0.114    | 0.031          | 0.190    | 0.005              | 0.261    | 0.000                               | 0.675    | 0.004                             | 0.382    | 0.042            | 0.162    |
| <b>MxD</b>    | 0.210             | 0.085    | 0.882          | 0.008    | 0.011              | 0.226    | 0.025                               | 0.194    | 0.496                             | 0.059    | 0.109            | 0.116    |

| <b>2-way ANOV A</b> | <i>Ileal SR-B1 (au)</i> |          | <i>Ileal colestero (mg/ g prot)</i> |          | <i>Ileal CD36 (au)</i> |          | <i>Ileal FAS (au)</i> |          | <i>Ileal ApoB (au)</i> |          | <i>Ileal MTTP (au)</i> |          |
|---------------------|-------------------------|----------|-------------------------------------|----------|------------------------|----------|-----------------------|----------|------------------------|----------|------------------------|----------|
|                     | p                       | $\eta^2$ | p                                   | $\eta^2$ | p                      | $\eta^2$ | p                     | $\eta^2$ | p                      | $\eta^2$ | p                      | $\eta^2$ |
| <b>M</b>            | 0.184                   | 0.050    | 0.410                               | 0.021    | 0.090                  | 0.080    | 0.173                 | 0.057    | 0.224                  | 0.047    | 0.161                  | 0.059    |
| <b>D</b>            | 0.001                   | 0.346    | 0.146                               | 0.110    | 0.096                  | 0.126    | 0.029                 | 0.198    | 0.043                  | 0.184    | 0.018                  | 0.217    |
| <b>MxD</b>          | 0.032                   | 0.179    | 0.027                               | 0.196    | 0.258                  | 0.074    | 0.002                 | 0.327    | 0.204                  | 0.097    | 0.281                  | 0.074    |

| <b>2-way ANOV A</b> | <i>Ileal Proglucagon (au)</i> |          | <i>Ileal PC 1/3 (au)</i> |          | <i>Ileal GLP2R (au)</i> |          | <i>Ileal IGF1 (au)</i> |          | <i>Ileal IGFBP4 (au)</i> |          | <i>Ileal IGF1R (au)</i> |          |
|---------------------|-------------------------------|----------|--------------------------|----------|-------------------------|----------|------------------------|----------|--------------------------|----------|-------------------------|----------|
|                     | p                             | $\eta^2$ | p                        | $\eta^2$ | p                       | $\eta^2$ | p                      | $\eta^2$ | p                        | $\eta^2$ | p                       | $\eta^2$ |
| <b>M</b>            | 0.684                         | 0.005    | 0.030                    | 0.131    | 0.013                   | 0.179    | 0.001                  | 0.263    | 0.407                    | 0.020    | 0.222                   | 0.045    |
| <b>D</b>            | 0.068                         | 0.159    | 0.000                    | 0.394    | 0.015                   | 0.231    | 0.029                  | 0.178    | 0.018                    | 0.211    | 0.558                   | 0.035    |
| <b>MxD</b>          | 0.210                         | 0.096    | 0.011                    | 0.232    | 0.000                   | 0.383    | 0.021                  | 0.193    | 0.003                    | 0.288    | 0.378                   | 0.057    |
