# Supplementary material for: Maternal fructose intake aggravates the harmful effects of a Western diet in rat male descendants impacting their cholesterol metabolism
Source: Royal Society of Chemistry journal article supplement (doi:10.1039/d4fo01466a), 2024-01-01
Supplement: d4fo01466a2.pdf [file d4fo01466a2.pdf]

ACC

n=1

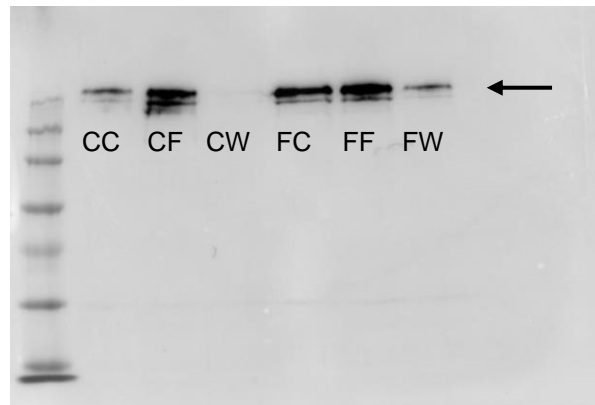

n=2

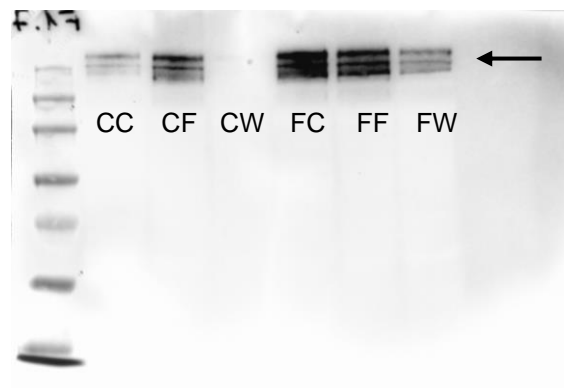

n=3

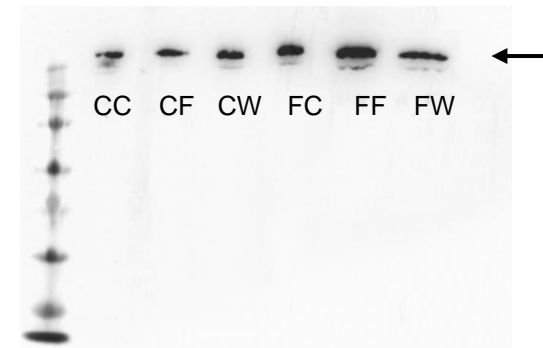

n=4

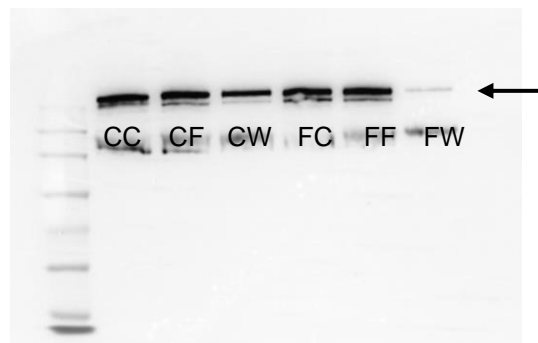

n=5

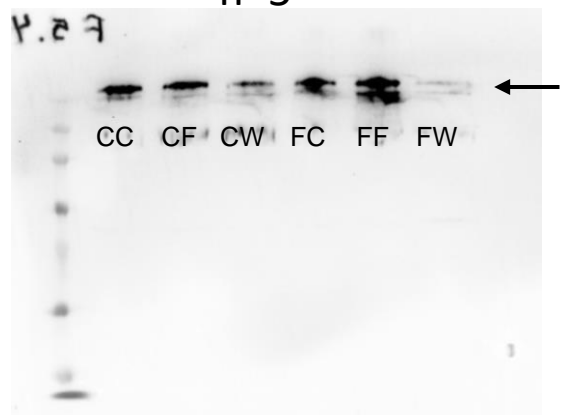

n=6

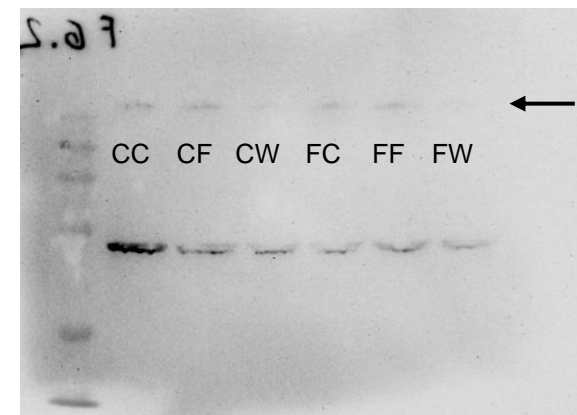

pACC

n=1

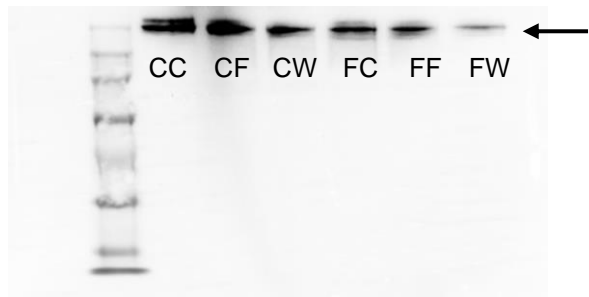

n=2

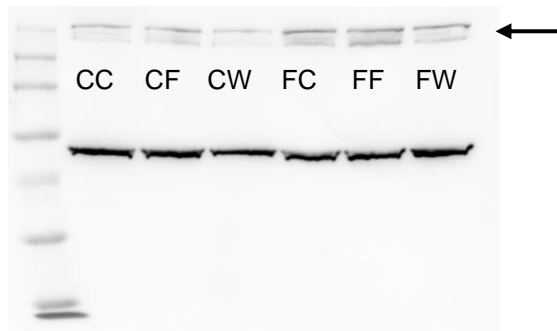

n=3

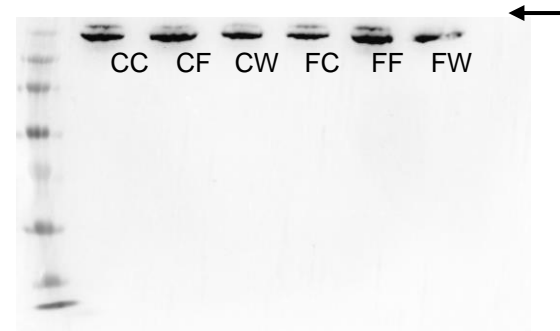

n=4

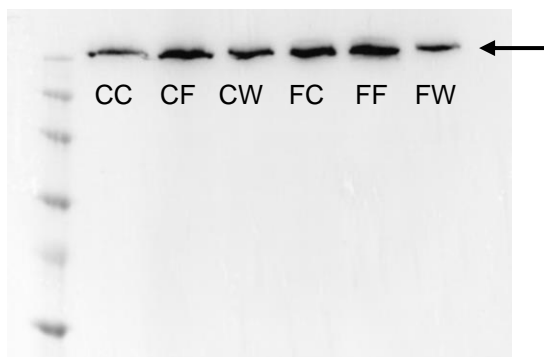

n=5

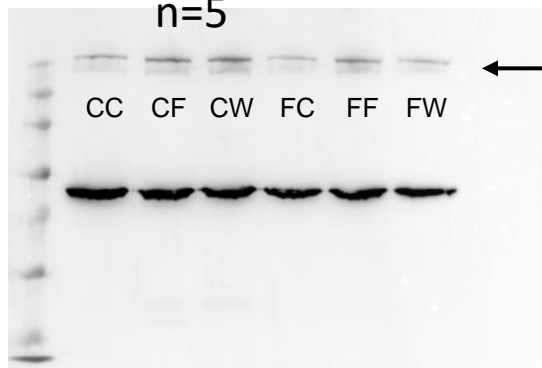

n=6

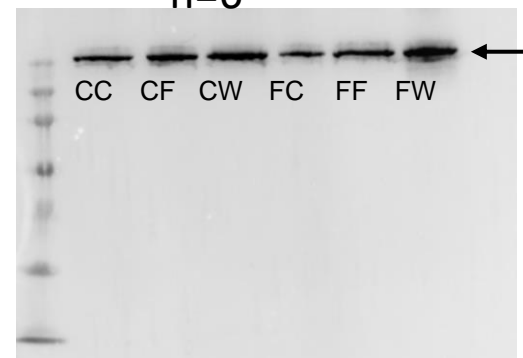

# DGAT1

n=1

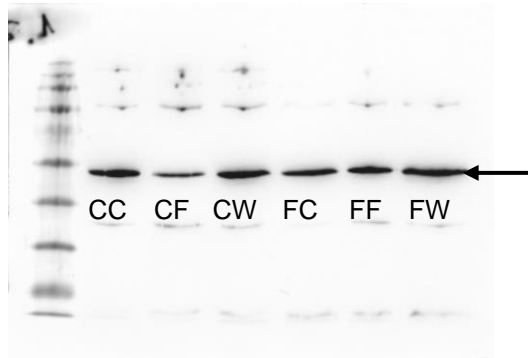

n=2

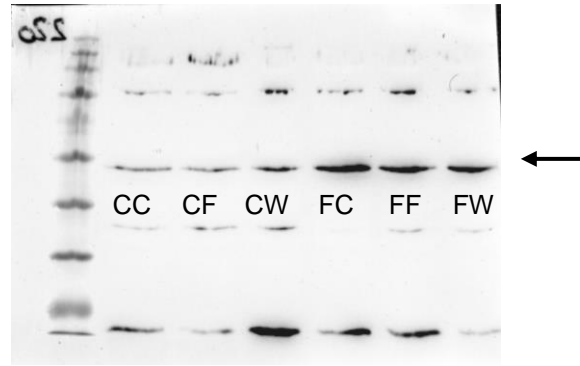

n=3

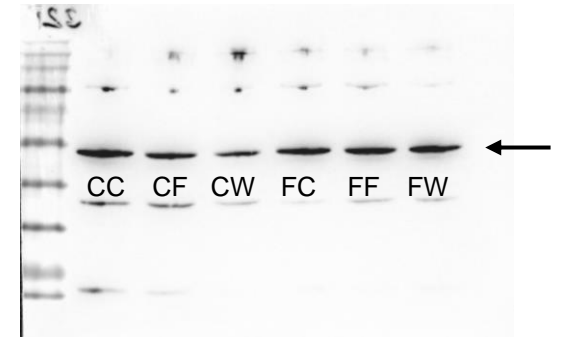

n=4

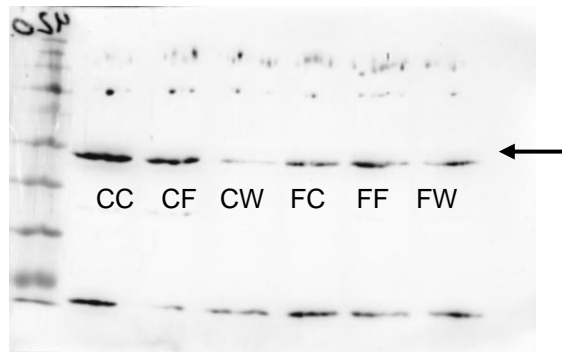

n=5

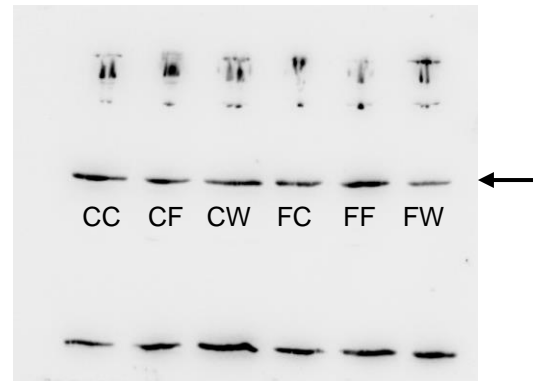

n=6

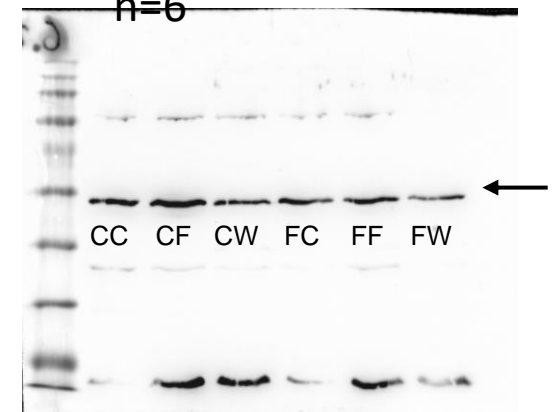

DGAT2

n=1

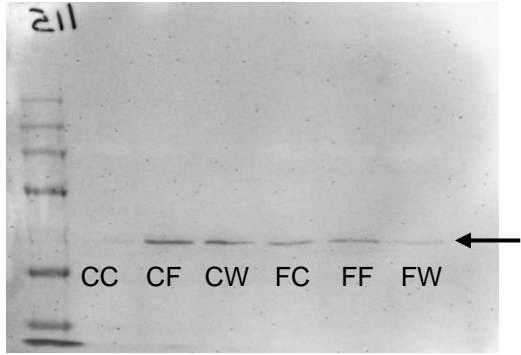

n=2

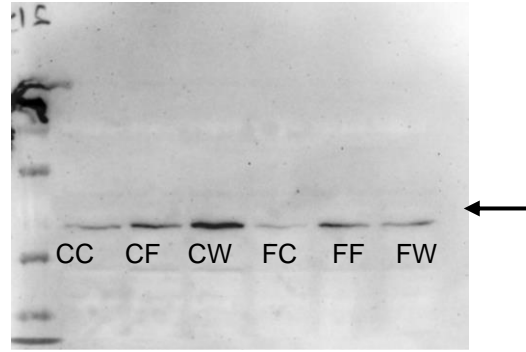

n=3

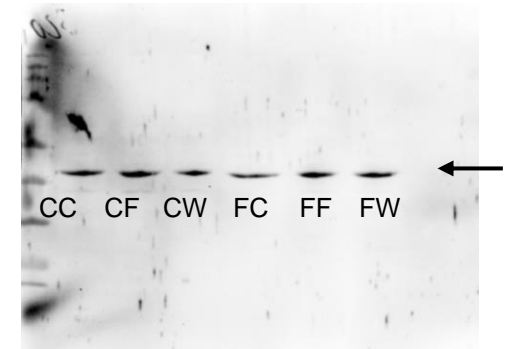

n=4

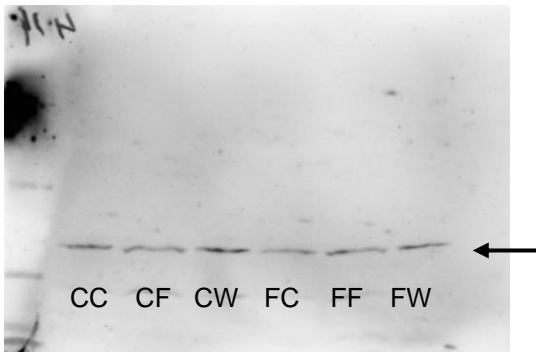

n=5

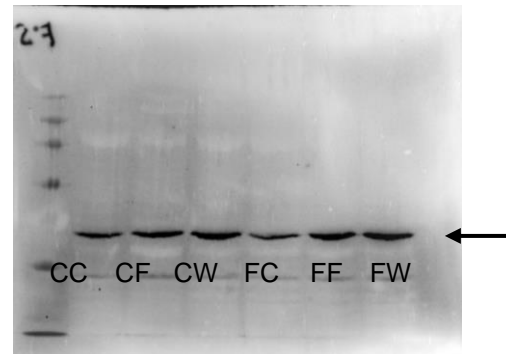

n=6

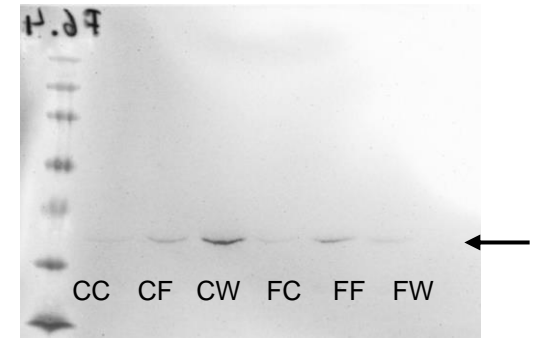

FASN

n=1

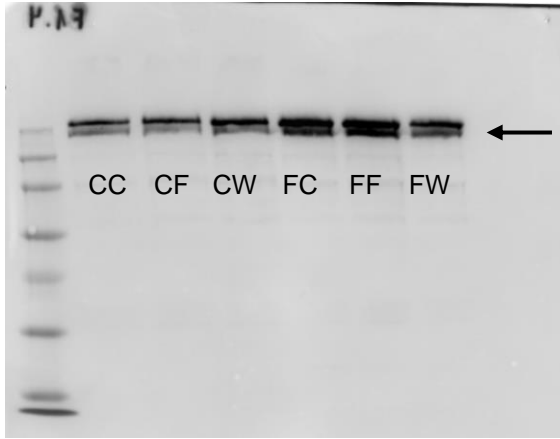

n=2

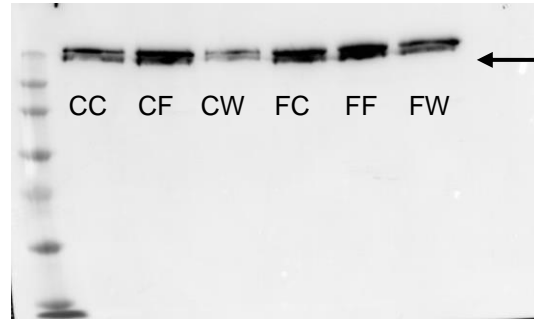

n=3

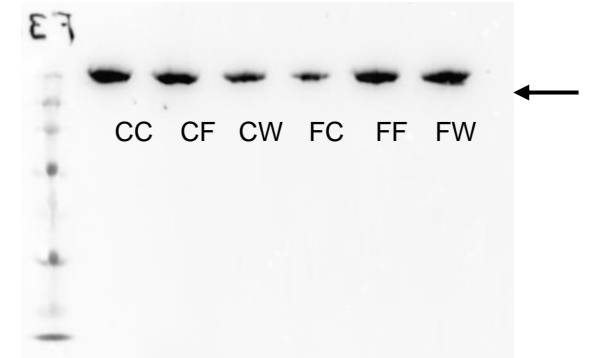

n=4

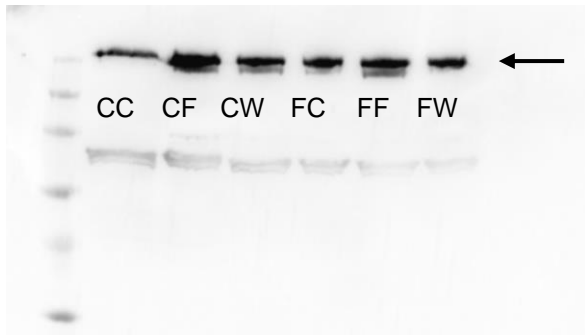

n=5

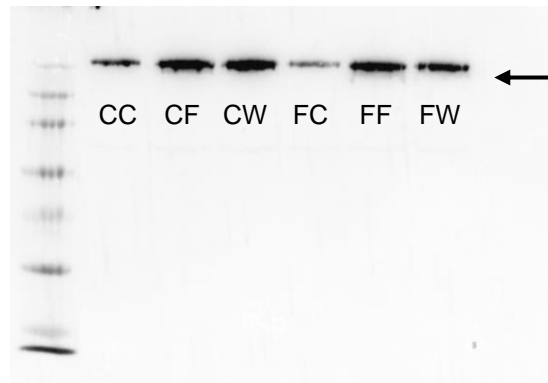

n=6

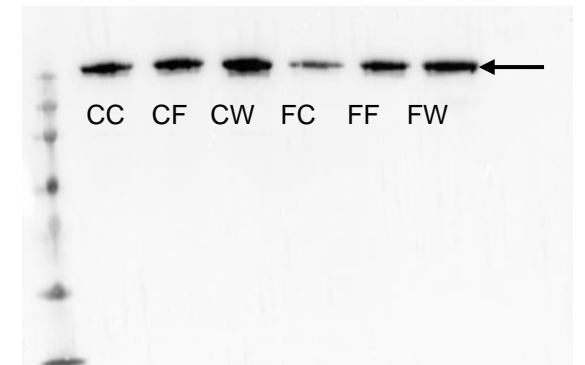

MTP1

n=1

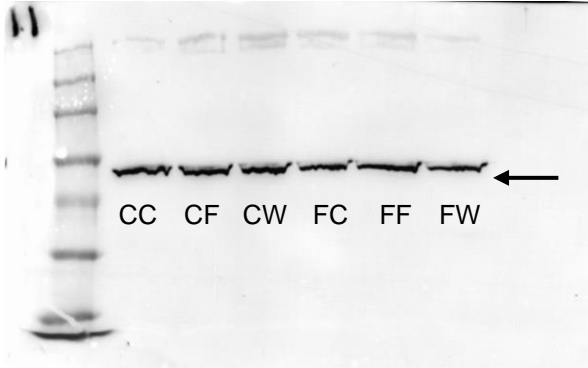

n=2

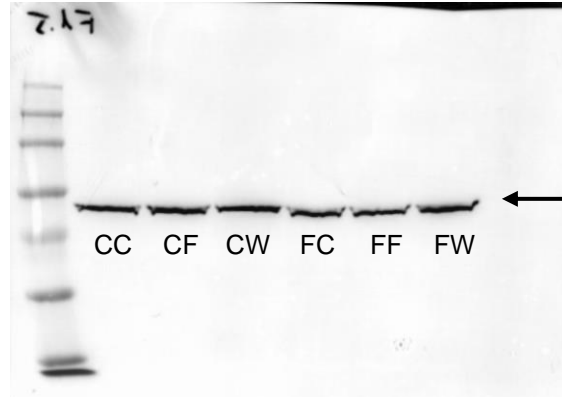

n=3

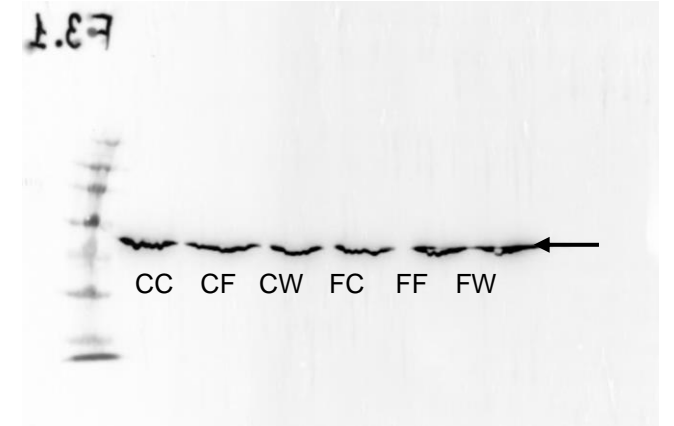

n=4

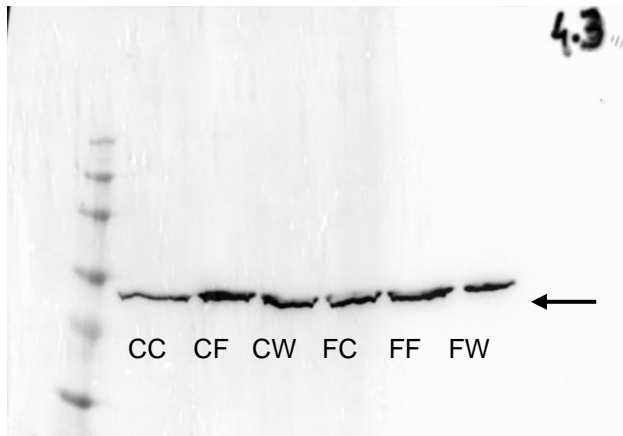

n=5

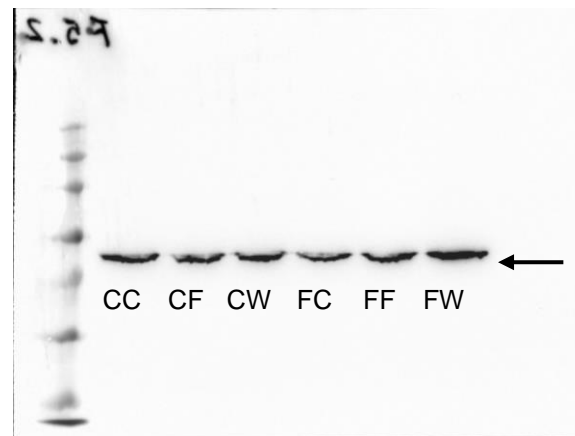

n=6

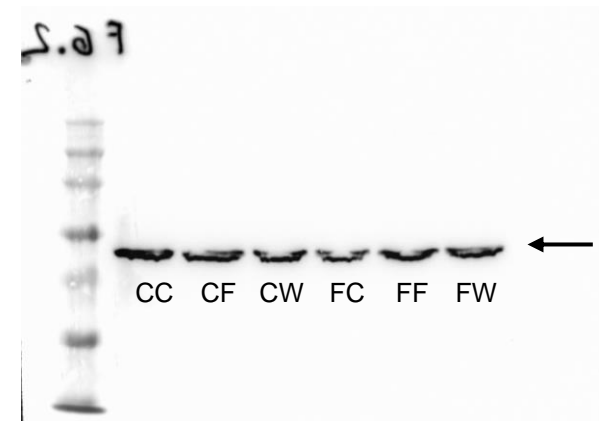

Vinculina

n=1

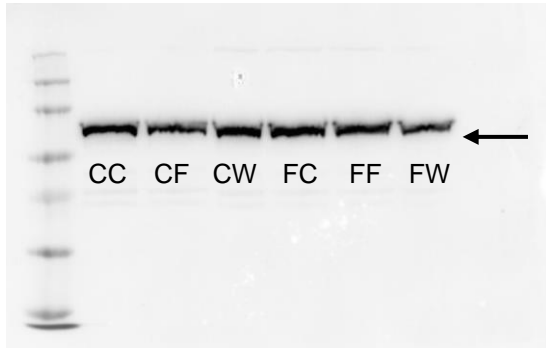

n=2

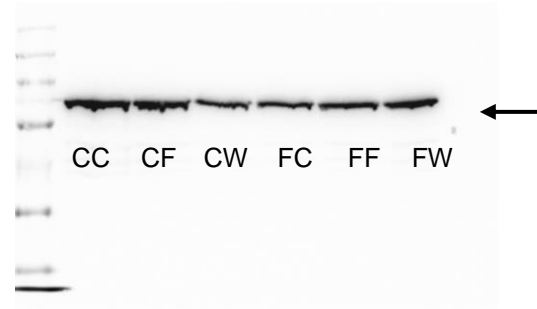

n=3

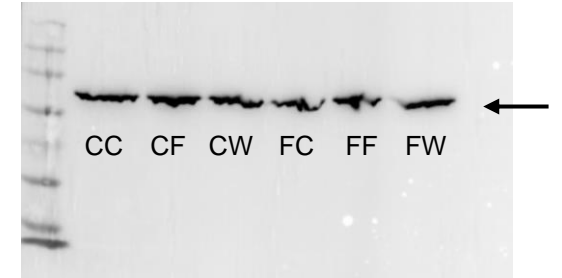

n=4

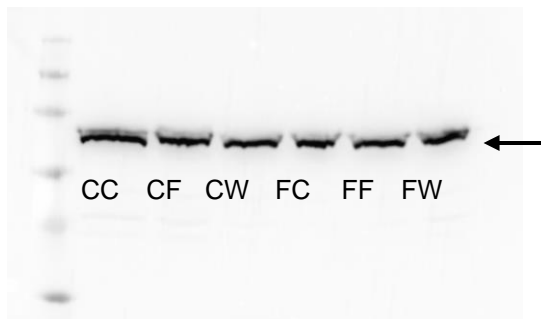

n=5

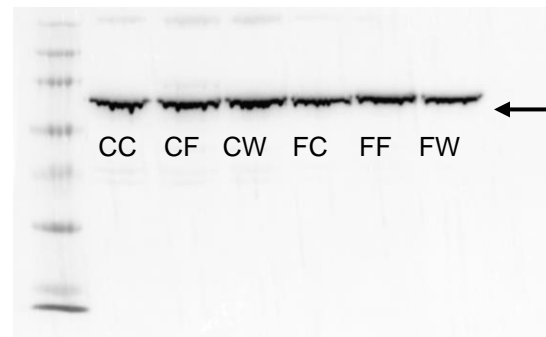

n=6

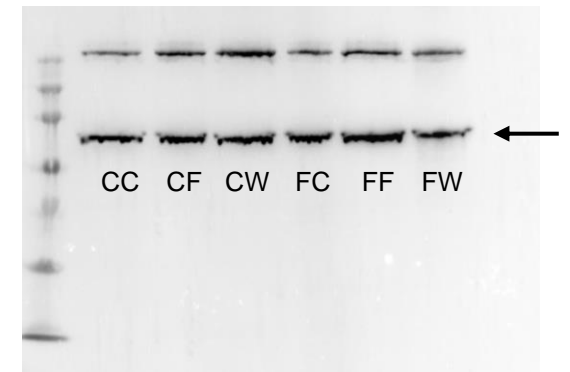

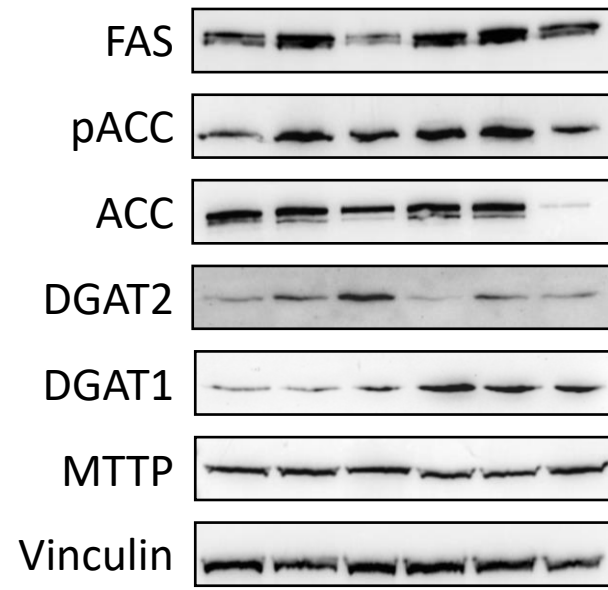



Sample  
identification

|     |      |      |      |      |      |      |
|-----|------|------|------|------|------|------|
| n=1 | C1C1 | C1F1 | C1W1 | F1C1 | F1F1 | F1W1 |
| n=2 | C1C2 | C1F2 | C1W2 | F1C2 | F1F2 | F1W2 |
| n=3 | C1C3 | C1F3 | C1W3 | F1C3 | F1F3 | F1W3 |
| n=4 | C1C4 | C1F4 | C1W4 | F1C4 | F1F4 | F1W4 |
| n=5 | C1C5 | C1F5 | C1W5 | F1C5 | F1F5 | F1W5 |
| n=6 | C1C6 | C1F6 | C1W6 | F1C6 | F1F6 | F1W6 |
